# Supplementary material for: Integrating Ecosystem Services in Nature Conservation for Colombia
Source: PubMed Central journal article supplement (PMC7320067; doi:10.1007/s00267-020-01301-9), 2020-05-28
Supplement: 267_2020_1301_MOESM3_ESM.pdf [file 267_2020_1301_MOESM3_ESM.pdf]

### Appendix 3 Coding framework, labels and description of variables used in the descriptive and MCA/HCA analysis of the projects.

| N. | Variable and items                                   | Code | Label                       | Description                                                                                                                                                                                                                                                                                             | Analysis               |
|----|------------------------------------------------------|------|-----------------------------|---------------------------------------------------------------------------------------------------------------------------------------------------------------------------------------------------------------------------------------------------------------------------------------------------------|------------------------|
| 1  | <b>ES consideration <sup>a</sup></b>                 |      |                             |                                                                                                                                                                                                                                                                                                         | Descriptive            |
|    | Explicit in the goals of the project                 | 1    | <i>explicit/goal</i>        | Specific use of the term “ecosystem services/environmental services” within the goals. Clear mention that nature provides to humankind                                                                                                                                                                  |                        |
|    | Implicit in the goals of the project                 | 2    | <i>implicit/goal</i>        | Notion that nature provides benefits to humankind within the goals. No specific term used within the goals                                                                                                                                                                                              |                        |
|    | Explicit throughout the body of the project          | 3    | <i>explicit/body</i>        | Specific use of the term “ecosystem services/environmental services” within the body of the project. Clear mention that nature provides benefits to humankind within the body of the project                                                                                                            |                        |
|    | Implicit throughout the body of the project          | 4    | <i>implicit/body</i>        | Clear notion that nature provides benefits to humankind along the project. No specific term used along the project                                                                                                                                                                                      |                        |
| 2  | <b>ES section <sup>b *</sup></b>                     |      |                             |                                                                                                                                                                                                                                                                                                         | MCA/HCA<br>Descriptive |
|    | Provisioning                                         | 1    | <i>provisioning</i>         | All nutritional, material and energetic outputs from living systems                                                                                                                                                                                                                                     |                        |
|    | Regulating & Maintenance                             | 2    | <i>regulating</i>           | Covers all the ways in which living organisms can mediate or moderate the ambient environment that affects human performance.                                                                                                                                                                           |                        |
|    | Cultural                                             | 3    | <i>cultural</i>             | Covers all the non-material, and normally non-consumptive, outputs of ecosystems that affect physical and mental states of people. Education was a frequently cultural ES.                                                                                                                              |                        |
| 3  | <b>Purpose of CEPA actions <sup>c</sup></b>          |      |                             |                                                                                                                                                                                                                                                                                                         | MCA/HCA<br>Descriptive |
|    | Without CEPA actions                                 | 1    | <i>without CEPA actions</i> | Projects that not included CEPA actions                                                                                                                                                                                                                                                                 |                        |
|    | CEPA as a mean (a strategy for conservation)         | 2    | <i>CEPA as a mean</i>       | Project defines specific conservation targets that it ultimately wants to influence project goals are focused on the project potential contribution to resolving environmental issues. CEPA actions are a component of multidisciplinary conservation efforts                                           |                        |
|    | CEPA as an end (as the main goal)                    | 3    | <i>CEPA as an end</i>       | Project does not target tangible conservation objectives, but it is believed that the implementation of any CEPA actions indirectly supports conservation project goals focus on the educational component rather than in the environmental component.                                                  |                        |
| 4  | <b>E. communication (EC) <sup>d</sup></b>            |      |                             |                                                                                                                                                                                                                                                                                                         | MCA/HCA                |
|    | Without EC                                           | 1    | <i>without EE</i>           | Projects that not included EC                                                                                                                                                                                                                                                                           |                        |
|    | EC                                                   | 2    | <i>communication</i>        | The process of developing and exchanging messages among different social agents aimed at promoting environmentally friendly and sustainable knowledge, attitudes, and behaviors.                                                                                                                        |                        |
| 5  | <b>E. education (EE) <sup>d</sup></b>                |      |                             |                                                                                                                                                                                                                                                                                                         | MCA/HCA                |
|    | Without EE                                           | 1    | <i>without EE</i>           | Projects that not included EE                                                                                                                                                                                                                                                                           |                        |
|    | EE                                                   | 2    | <i>education</i>            | The learning process through which knowledge of conservation principles and problems increase and attitudes and behaviors that show concern for the environment are promoted through an appropriate pedagogical process.                                                                                |                        |
| 6  | <b>E. participation (EP) <sup>d</sup></b>            |      |                             |                                                                                                                                                                                                                                                                                                         | MCA/HCA                |
|    | Without EP                                           | 1    | <i>without EP</i>           | Projects that not included EP                                                                                                                                                                                                                                                                           |                        |
|    | EP                                                   | 2    | <i>participation</i>        | The range of strategies aimed at building the capacity of citizens to make decisions related to conservation. Strategies include training, policy development, and collaborative management and involve the educator and the learner working together to define the goals and methods of interventions. |                        |
| 7  | <b>Integration of type CEPA actions <sup>c</sup></b> |      |                             |                                                                                                                                                                                                                                                                                                         | MCA/HCA                |
|    | None integration                                     | 1    | <i>none integration</i>     | Projects that not included CEPA actions                                                                                                                                                                                                                                                                 |                        |
|    | Low integration                                      | 2    | <i>low</i>                  | Only one type CEPA was present in the project                                                                                                                                                                                                                                                           |                        |
|    | Medium integration                                   | 3    | <i>medium</i>               | Two types of CEPA were present in the project                                                                                                                                                                                                                                                           |                        |

|    |                                                          |   |                                              |                                                                                                                                                                                              |                        |
|----|----------------------------------------------------------|---|----------------------------------------------|----------------------------------------------------------------------------------------------------------------------------------------------------------------------------------------------|------------------------|
|    | High integration                                         | 4 | <i>high</i>                                  | All CEPA (EC, EE, EP) were present in the project                                                                                                                                            |                        |
| 8  | <b>Main conservation actions<sup>e</sup></b>             |   |                                              |                                                                                                                                                                                              | MCA/HCA<br>Descriptive |
|    | Land/water management                                    | 1 | <i>land/water management</i>                 | Actions directed at conserving or restoring sites, habitats and the wider environment                                                                                                        |                        |
|    | Species management                                       | 2 | <i>sps. management</i>                       | Actions directed at managing or restoring species, focused on the species of concern itself                                                                                                  |                        |
|    | Education and awareness                                  | 3 | <i>education &amp; awareness</i>             | Actions directed at people to improve environmental understanding and skills, and influence behavior                                                                                         |                        |
|    | Sustainable livelihood                                   | 4 | <i>livelihood</i>                            | Actions to use the nature for economic and sustainable activities                                                                                                                            |                        |
| 9  | <b>Main stakeholders<sup>f</sup></b>                     |   |                                              |                                                                                                                                                                                              | MCA/HCA<br>Descriptive |
|    | Without stakeholder                                      | 1 | <i>without stakehold.</i>                    | Projects that not included any actions engaging social actors                                                                                                                                |                        |
|    | Local communities                                        | 2 | <i>local communities</i>                     | General social group targeted in the project (mentioned commonly as community, participants, beneficiary families, local people, inhabitants, community groups, indigenous/afro communities) |                        |
|    | Small-scale producers                                    | 3 | <i>small-scale</i>                           | Small producers, farmers, and small associations (e.g. ecotourism, artisans)                                                                                                                 |                        |
|    | School children                                          | 4 | <i>school children</i>                       | Students and children                                                                                                                                                                        |                        |
|    | Environmental government staff & Decision makers         | 5 | <i>env. gov. Staff &amp; decision makers</i> | RAC staff, Natural Parks and protected areas committees staff, mayors, basin councils, community council of the indigenous, indigenous cabildo, municipal authorities                        |                        |
|    | Environmental leaders & groups                           | 6 | <i>env.people</i>                            | Environmental promoters, environmental education committees, Communal Action board, Environmental National Police.                                                                           |                        |
| 10 | <b>Women<sup>e,f</sup></b>                               |   |                                              |                                                                                                                                                                                              | Descriptive            |
|    | Without women                                            | 1 | <i>without women</i>                         | Projects that not included women                                                                                                                                                             |                        |
|    | Women                                                    | 2 | <i>women</i>                                 | Women was targeted by the project (not necessarily as the main actor)                                                                                                                        |                        |
| 11 | <b>Unrepresented population<sup>f</sup></b>              |   |                                              |                                                                                                                                                                                              | Descriptive            |
|    | Without unrepresented population                         | 1 | <i>without unrepres.</i>                     | Projects that not included indigenous and Afro-descendent communities                                                                                                                        |                        |
|    | Indigenous and Afro communities                          | 2 | <i>indigen/afro</i>                          | Indigenous and Afro-descendent communities were targeted by the project (not necessarily as the main stakeholder)                                                                            |                        |
| 12 | <b>Spatial scale<sup>c</sup></b>                         |   |                                              |                                                                                                                                                                                              | MCA/HCA                |
|    | Regional                                                 | 1 | <i>regional</i>                              | > 4 municipalities, frequently covered all RAC                                                                                                                                               |                        |
|    | Local                                                    | 2 | <i>local</i>                                 | limiter to four municipalitie                                                                                                                                                                |                        |
| 13 | <b>Budget<sup>g</sup></b>                                |   |                                              |                                                                                                                                                                                              | MCA/HCA<br>Descriptive |
|    | Unspecified                                              | 1 | <i>unspecified</i>                           | Some projects there are not budget in one or any year                                                                                                                                        |                        |
|    | Low                                                      | 2 | <i>low budget</i>                            | <150000 US                                                                                                                                                                                   |                        |
|    | Medium                                                   | 3 | <i>medium budget</i>                         | 150.000 to 500.000 US                                                                                                                                                                        |                        |
|    | High                                                     | 4 | <i>high budget</i>                           | >500.000 US                                                                                                                                                                                  |                        |
| 14 | <b>Duration<sup>h</sup></b>                              |   |                                              |                                                                                                                                                                                              | MCA/HCA<br>Descriptive |
|    | One year                                                 | 1 | <i>one year</i>                              | Duration of the project: one year                                                                                                                                                            |                        |
|    | 2-4 years                                                | 2 | <i>2-4 years</i>                             | Duration of the project: 2-4 years                                                                                                                                                           |                        |
|    | >4 years                                                 | 3 | <i>&gt;4 years</i>                           | Duration of the project: > 4 years                                                                                                                                                           |                        |
| 15 | <b>General goal (GG)<sup>g</sup></b>                     |   |                                              |                                                                                                                                                                                              | Descriptive            |
|    | Without GG                                               | 1 | <i>without GG</i>                            | Projects without general goal                                                                                                                                                                |                        |
|    | GG                                                       | 2 | <i>general goal</i>                          | Description of general goal in the projects                                                                                                                                                  |                        |
| 16 | <b>Specific goals<sup>g</sup></b>                        |   |                                              |                                                                                                                                                                                              | Descriptive            |
|    | Without SG                                               | 1 | <i>without SG</i>                            | Projects without specifics goals                                                                                                                                                             |                        |
|    | SG                                                       | 2 | <i>specific goal</i>                         | Description of specific goals in the projects                                                                                                                                                |                        |
| 17 | <b>Triennial Action Plans<sup>h</sup></b>                |   |                                              |                                                                                                                                                                                              | Descriptive            |
|    | TAP 1 (2004-2006)                                        | 1 | <i>TAP1</i>                                  | The project was developed between 2004-2006                                                                                                                                                  |                        |
|    | TAP 2 (2007-2011)                                        | 2 | <i>TAP2</i>                                  | The project was developed between 2007-2011                                                                                                                                                  |                        |
|    | TAP 3 (2012-2015)                                        | 3 | <i>TAP3</i>                                  | The project was developed between 2012-2015                                                                                                                                                  |                        |
| 18 | <b>Continuity of the project in the TAPs<sup>h</sup></b> |   |                                              |                                                                                                                                                                                              | Descriptive            |
|    | One TAP                                                  | 1 | <i>oneTAP</i>                                | The project lasted only one TAP                                                                                                                                                              |                        |
|    | Two TAP                                                  | 2 | <i>twoTAP</i>                                | The project lasted two TAPs                                                                                                                                                                  |                        |

| 19 | Number of projects by RAC |   |         |                  | Descriptive |
|----|---------------------------|---|---------|------------------|-------------|
|    | <20                       | 1 | <20     | <20 projects     |             |
|    | 20-40                     | 2 | 20-40   | 20-40 projects   |             |
|    | 41-60                     | 3 | 41-60   | 41-60 projects   |             |
|    | 61-80                     | 4 | 61-80   | 61-80 projects   |             |
|    | 81-100                    | 5 | 81-100  | 81-100 projects  |             |
|    | 101-150                   | 6 | 101-150 | 101-150 projects |             |
|    | >150                      | 7 | >150    | >150 projects    |             |

<sup>a</sup> Based on Goldman and Tallis 2009; Hansen et al, 2015. Nordin et al. 2017

<sup>b</sup> Based on Haines-Young R, Potschin M (2018)

<sup>c</sup> Based on Jiménez et al. 2014 and 2015

<sup>d</sup> Based on Jiménez et al. 2014 and 2015; Hesselink et al. 2007

<sup>e</sup> Salafsky et al., 2008

<sup>f</sup> Based on United Nations, 1992

<sup>g</sup> Based on Goldman & Tallis, 2009

<sup>h</sup> Emergent information

\* for specific explanation see Table 1
