# Supplementary material for: Integrating Ecosystem Services in Nature Conservation for Colombia
Source: PubMed Central journal article supplement (PMC7320067; doi:10.1007/s00267-020-01301-9), 2020-05-28
Supplement: 267_2020_1301_MOESM4_ESM.pdf [file 267_2020_1301_MOESM4_ESM.pdf]

**Appendix 4 Factor scored derived from Multiple Correspondence Analysis (MCA) to know social actions in the conservation projects. Bold scores have statistical significance (p <0.05)**

| Label of variables                           | Factor scores |               |
|----------------------------------------------|---------------|---------------|
|                                              | F1            | F2            |
| <i>provisioning</i>                          | -0,083        | 0,186         |
| <i>regulating</i>                            | 0,111         | <b>0,219</b>  |
| <i>cultural</i>                              | -0,049        | <b>-0,396</b> |
| <i>without CEPA actions</i>                  | <b>1,207</b>  | 0,068         |
| <i>CEPA as a strategy</i>                    | <b>-0,161</b> | <b>0,167</b>  |
| <i>pure CEPA</i>                             | -0,267        | <b>-0,680</b> |
| <i>without env. communication</i>            | <b>0,400</b>  | 0,040         |
| <i>env. communication</i>                    | <b>-0,274</b> | -0,028        |
| <i>without env. education</i>                | <b>0,537</b>  | -0,053        |
| <i>env. Education</i>                        | <b>-0,251</b> | 0,025         |
| <i>without env. participation</i>            | <b>0,203</b>  | <b>-0,130</b> |
| <i>env. participation</i>                    | <b>-0,259</b> | <b>0,166</b>  |
| <i>management</i>                            | 0,133         | <b>0,166</b>  |
| <i>sps. management</i>                       | 0,203         | -0,006        |
| <i>CEPA actions</i>                          | -0,257        | <b>-0,667</b> |
| <i>livelihood</i>                            | -0,106        | 0,152         |
| <i>any integration</i>                       | <b>1,207</b>  | 0,068         |
| <i>low</i>                                   | 0,084         | -0,186        |
| <i>medium</i>                                | <b>-0,214</b> | 0,000         |
| <i>high</i>                                  | <b>-0,431</b> | 0,167         |
| <i>regional</i>                              | -0,066        | -0,015        |
| <i>local</i>                                 | 0,212         | 0,049         |
| <i>unspecified</i>                           | 0,305         | -0,088        |
| <i>low budget</i>                            | 0,081         | -0,136        |
| <i>medium budget</i>                         | -0,151        | 0,053         |
| <i>high budget</i>                           | -0,134        | 0,223         |
| <i>one year</i>                              | <b>0,267</b>  | -0,179        |
| <i>2-4 years</i>                             | -0,134        | 0,056         |
| <i>&gt;4 years</i>                           | -0,184        | 0,182         |
| <i>without stakehold.</i>                    | <b>1,207</b>  | 0,068         |
| <i>local communities</i>                     | -0,153        | 0,003         |
| <i>small-scale</i>                           | -0,260        | 0,184         |
| <i>school children</i>                       | -0,277        | -0,377        |
| <i>env. gov. Staff &amp; decision makers</i> | -0,086        | 0,193         |
| <i>pro-env. people</i>                       | -0,192        | -0,229        |
| <b>MCA values</b>                            |               |               |
| Eigenvalues                                  | 0,101         | 0,036         |
| Adjusted inertia (%)                         | 49,642        | 17,673        |
| Cumulative inertia (%)                       | 49,642        | 67,314        |
