# Supplementary material for: Integrating Ecosystem Services in Nature Conservation for Colombia
Source: PubMed Central journal article supplement (PMC7320067; doi:10.1007/s00267-020-01301-9), 2020-05-28
Supplement: 267_2020_1301_MOESM5_ESM.pdf [file 267_2020_1301_MOESM5_ESM.pdf]

## Appendix 5 Number of conservation projects in each of the 4 groups of CEPA projects identified by the hierarchical cluster analysis (HCA).

| Variable and items <sup>a</sup>              | Environmental management without society engagement (n=24) | Environmental awareness (n=32) | Integrated participation for fostering sustainable livelihoods (n=49) | Small conservation actions with local communities (n=77) | Chi-square test <sup>b</sup> | df |
|----------------------------------------------|------------------------------------------------------------|--------------------------------|-----------------------------------------------------------------------|----------------------------------------------------------|------------------------------|----|
| <b>ES category</b>                           |                                                            |                                |                                                                       |                                                          | 12.59**                      | 6  |
| <i>provisioning</i>                          | 6                                                          | 0*                             | 22*                                                                   | 24                                                       |                              |    |
| <i>regulating</i>                            | 12                                                         | 0*                             | 25*                                                                   | 30                                                       |                              |    |
| <i>cultural</i>                              | 6                                                          | 32*                            | 2*                                                                    | 23                                                       |                              |    |
| <b>Purpose of CEPA actions</b>               |                                                            |                                |                                                                       |                                                          | 12.59**                      | 6  |
| <i>without CEPA actions</i>                  | 24*                                                        | 0*                             | 0*                                                                    | 0*                                                       |                              |    |
| <i>CEPA as a strategy</i>                    | 0*                                                         | 0*                             | 49*                                                                   | 76*                                                      |                              |    |
| <i>pure CEPA</i>                             | 0*                                                         | 32*                            | 0*                                                                    | 1*                                                       |                              |    |
| <b>E. communication</b>                      |                                                            |                                |                                                                       |                                                          | 7.81**                       | 3  |
| <i>without EE</i>                            | 24*                                                        | 5*                             | 9*                                                                    | 36                                                       |                              |    |
| <i>EC</i>                                    | 0*                                                         | 27*                            | 40*                                                                   | 41                                                       |                              |    |
| <b>E. education</b>                          |                                                            |                                |                                                                       |                                                          | 7.81**                       | 3  |
| <i>without EE</i>                            | 24*                                                        | 7                              | 0*                                                                    | 27                                                       |                              |    |
| <i>EE</i>                                    | 0*                                                         | 25                             | 49*                                                                   | 50                                                       |                              |    |
| <b>E. participation</b>                      |                                                            |                                |                                                                       |                                                          | 7.81**                       | 3  |
| <i>without EP</i>                            | 24*                                                        | 21                             | 5*                                                                    | 52*                                                      |                              |    |
| <i>EP</i>                                    | 0*                                                         | 11                             | 44*                                                                   | 25*                                                      |                              |    |
| <b>Integration of type CEPA actions</b>      |                                                            |                                |                                                                       |                                                          | 16.91**                      | 9  |
| <i>none integration</i>                      | 24*                                                        | 0*                             | 0*                                                                    | 0*                                                       |                              |    |
| <i>low</i>                                   | 0*                                                         | 11                             | 0*                                                                    | 38*                                                      |                              |    |
| <i>medium</i>                                | 0*                                                         | 11                             | 14                                                                    | 39*                                                      |                              |    |
| <i>high</i>                                  | 0*                                                         | 10                             | 35*                                                                   | 0*                                                       |                              |    |
| <b>Main conservation action</b>              |                                                            |                                |                                                                       |                                                          | 16.91**                      | 9  |
| <i>land/water management</i>                 | 18*                                                        | 0*                             | 29                                                                    | 46                                                       |                              |    |
| <i>sps. management</i>                       | 1                                                          | 0*                             | 0*                                                                    | 6*                                                       |                              |    |
| <i>education&amp;awarenes</i>                | 0*                                                         | 32*                            | 0*                                                                    | 2*                                                       |                              |    |
| <i>livelihood</i>                            | 5                                                          | 0*                             | 20*                                                                   | 23                                                       |                              |    |
| <b>Main stakeholders</b>                     |                                                            |                                |                                                                       |                                                          | 24.96**                      | 15 |
| <i>without stakehold.</i>                    | 24*                                                        | 0*                             | 0*                                                                    | 0*                                                       |                              |    |
| <i>local communities</i>                     | 0*                                                         | 13                             | 22                                                                    | 39*                                                      |                              |    |
| <i>small-scale</i>                           | 0*                                                         | 1*                             | 17*                                                                   | 14                                                       |                              |    |
| <i>school children</i>                       | 0*                                                         | 5*                             | 2                                                                     | 2                                                        |                              |    |
| <i>env. gov. Staff &amp; decision makers</i> | 0                                                          | 1                              | 5                                                                     | 7                                                        |                              |    |
| <i>env.people</i>                            | 0                                                          | 12*                            | 3*                                                                    | 15                                                       |                              |    |
| <b>Spatial scale</b>                         |                                                            |                                |                                                                       |                                                          | 7.81**                       | 3  |
| <i>regional</i>                              | 16                                                         | 30*                            | 42                                                                    | 51*                                                      |                              |    |
| <i>local</i>                                 | 8                                                          | 2*                             | 7*                                                                    | 26*                                                      |                              |    |
| <b>Budget</b>                                |                                                            |                                |                                                                       |                                                          | 16.91**                      | 9  |
| <i>unspecified</i>                           | 6                                                          | 4                              | 7                                                                     | 8                                                        |                              |    |
| <i>low budget</i>                            | 9                                                          | 16                             | 9*                                                                    | 40*                                                      |                              |    |
| <i>medium budget</i>                         | 4                                                          | 8                              | 14                                                                    | 18                                                       |                              |    |
| <i>high budget</i>                           | 5                                                          | 4                              | 23*                                                                   | 11*                                                      |                              |    |
| <b>Duration</b>                              |                                                            |                                |                                                                       |                                                          | 12.59**                      | 6  |
| <i>one year</i>                              | 14*                                                        | 15                             | 3*                                                                    | 34                                                       |                              |    |
| <i>2-4 years</i>                             | 7                                                          | 14                             | 28*                                                                   | 25*                                                      |                              |    |
| <i>&gt;4 years</i>                           | 3                                                          | 3*                             | 18*                                                                   | 18                                                       |                              |    |

<sup>a</sup> Only variables/items whose p-value for chi-squares test was less than 0.1 are compiled in this table

<sup>b</sup> Significance value: \*p<0.05; \*\*p<0.001
