# Supplementary material for: Integrating Ecosystem Services in Nature Conservation for Colombia
Source: Environ Manage. 2020 May 28;66(2):149–61. doi: 10.1007/s00267-020-01301-9 (PMC7320067; doi:10.1007/s00267-020-01301-9)
Supplement: Supplementary file 2 — Supplementary Material 2 [file 267_2020_1301_MOESM2_ESM.pdf]

## Appendix 2 List of the 182 projects selected in the RACs

| Title of the project                                                                                                                                                                                                 | RAC implementing |
|----------------------------------------------------------------------------------------------------------------------------------------------------------------------------------------------------------------------|------------------|
| Fortalecimiento de una cultura ambiental y de participación ciudadana                                                                                                                                                | CADER            |
| Incorporación de las determinantes ambientales en los instrumentos de planificación y el ordenamiento territorial                                                                                                    | CADER            |
| Fortalecimiento de la gestión del conocimiento                                                                                                                                                                       | CADER            |
| Consolidación de un circuito para el turismo sostenible en la cuenca media alta del río Otún                                                                                                                         | CADER            |
| Implementar bosques FLEGT - Colombia                                                                                                                                                                                 | CADER            |
| Planificación y gestión ambiental local y regional                                                                                                                                                                   | CADER            |
| Apoyo a la comercialización de productos derivados del aprovechamiento sostenible de la biodiversidad                                                                                                                | CADER            |
| Fomento y apoyo al ecoturismo en torno al río Magdalena                                                                                                                                                              | CAM              |
| Uso sostenible de la biodiversidad y negocios verdes                                                                                                                                                                 | CAM              |
| Planificación y gestión integral del recurso hídrico                                                                                                                                                                 | CAM              |
| Gestión y abastecimiento hídrico                                                                                                                                                                                     | CAR              |
| Gestión de distritos de riego                                                                                                                                                                                        | CAR              |
| Planeación de la ordenación y el manejo de cuencas hidrográficas                                                                                                                                                     | CAR              |
| Conservación, recuperación y restauración de los ecosistemas y la oferta natural                                                                                                                                     | CAR              |
| Gestión proyectos ambientales                                                                                                                                                                                        | CARDIQUE         |
| Ordenamiento y manejo integrado Ciénaga de la Virgen                                                                                                                                                                 | CARDIQUE         |
| Gestión de los recursos naturales                                                                                                                                                                                    | CARDIQUE         |
| Estudio y recuperación de la caña guadua en la jurisdicción de Carsucré                                                                                                                                              | CARSUCRE         |
| Recuperación y manejo de la caña flecha en zonas indígenas                                                                                                                                                           | CARSUCRE         |
| Recuperación y manejo sostenible de la palma amarga en zonas indígenas                                                                                                                                               | CARSUCRE         |
| Formación de promotores ambientales                                                                                                                                                                                  | CAS              |
| Conocimiento y conservación de la biodiversidad                                                                                                                                                                      | CAS              |
| Fortalecimiento al control, seguimiento y monitoreo a los usos y provechamiento de los recursos naturales y a las obras de desarrollo                                                                                | CDA              |
| Apoyo al monitoreo e implementación de una estrategia integral y sostenible de reducción de cultivos ilícitos y promoción del desarrollo alternativo en Colombia, bajo la cultura de la legalidad 2014               | CDA              |
| Recuperación de áreas degradadas en la zona de reserva campesina año 2012, Departamento del Guaviare                                                                                                                 | CDA              |
| Apoyo a los procesos organizativos para la producción y ventanilla verde de servicios como son ecoetiquetados y ecoturismo                                                                                           | CDA              |
| Evaluación del estado de las poblaciones de quelonios del género <i>Podocnemis</i> en la cuenca baja del río Guaviare en el departamento de Guainía                                                                  | CDA              |
| Fortalecimiento al proceso de planificación ambiental, local, para la conservación, recuperación y uso sostenible del sistema de humedales del municipio de Mitú                                                     | CDA              |
| Implementación de sistemas productivos sostenibles como estrategia de desarrollo regional de los departamentos de Guainía, Guaviare y Vaupés                                                                         | CDA              |
| Restauración de chagras tradicionales como alternativa para el retorno y ocupación permanente de los grupos Nukak desplazados por factores exógenos sector estratégico resguardo Nukak Maku departamento de Guaviare | CDA              |
| Conservación, investigación y propagación de la flora del nororiente de Santander en el Jardín Botánico Eloy Valenzuela                                                                                              | CDMB             |
| Educación ambiental y participación social para la gestión ambiental integrada y compartida en el área de jurisdicción de la CDMB                                                                                    | CDMB             |
| Fomento y apoyo al sector productivo industrial en la implementación de la producción más limpia y el acceso a mercados verdes                                                                                       | CDMB             |
| Restauración, conservación y uso sostenible de los humedales del Medio y Bajo Lebrija                                                                                                                                | CDMB             |
| Conservación, investigación y propagación de la flora del nororiente de Santander en el Jardín Botánico Eloy Valenzuela                                                                                              | CDMB             |
| Administración para la gobernanza forestal en el departamento del Chocó                                                                                                                                              | CODECHOCÓ        |
| Ordenamiento de los recursos naturales y del territorio en el departamento del Chocó                                                                                                                                 | CODECHOCÓ        |
| Implementación de estudio base para especies forestales amenazadas                                                                                                                                                   | CODECHOCÓ        |
| Implementación de plantaciones forestales en comunidades indígenas, negras y campesinas del bajo atrato en el departamento del Chocó                                                                                 | CODECHOCÓ        |
| Agroforestería comunitaria asociada a mercados verdes y biocomercio en el departamento del Chocó                                                                                                                     | CODECHOCÓ        |
| Formulación e implementación del plan de ordenación y manejo de la cuenca del río Condoto e implementación de once planes adoptados por Codechoco                                                                    | CODECHOCÓ        |
| Fortalecimiento de la administración de áreas protegidas en la Reserva de Biosfera Seaflower                                                                                                                         | CORALINA         |

|                                                                                                                                                                                                             |               |
|-------------------------------------------------------------------------------------------------------------------------------------------------------------------------------------------------------------|---------------|
| Ordenación y aprovechamiento de los bosques naturales y plantados                                                                                                                                           | CORANTIOQUIA  |
| Planificación hidrológica participativa                                                                                                                                                                     | CORANTIOQUIA  |
| Promoción de la cultura de la legalidad ambiental                                                                                                                                                           | CORANTIOQUIA  |
| Conservación y manejo sostenible del bosque, la flora y la fauna                                                                                                                                            | CORANTIOQUIA  |
| Gestión ambiental integral articulada a lo local                                                                                                                                                            | CORANTIOQUIA  |
| Implementación de estrategias de producción mas limpia                                                                                                                                                      | CORMACARENA   |
| Planificación y ordenamiento del recurso hídrico                                                                                                                                                            | CORMACARENA   |
| Promoción de alternativas de mercados verdes e implementación de medidas sanitarias y fitosanitarias                                                                                                        | CORMACARENA   |
| Gestión productiva sostenible en el sector primario de la economía                                                                                                                                          | CORNARE       |
| Procesos de restauración, conservación y manejo de los ecosistemas boscosos de la región                                                                                                                    | CORNARE       |
| Desarrollo de procesos de sensibilización y fortalecimiento de la cultura ambiental                                                                                                                         | CORNARE       |
| Investigación aplicada para la mitigación de impactos ambientales                                                                                                                                           | CORNARE       |
| Participación interinstitucional para la formulación y seguimiento de planes ecoturísticos en la región                                                                                                     | CORNARE       |
| Conclusión, formulación e implementación del plan maestro para el Parque Arví Valles de San Nicolás                                                                                                         | CORNARE       |
| Gestión y apoyo al Parque Regional Ecoturístico Arví                                                                                                                                                        | CORNARE       |
| Asesoría y apoyo en la armonización de la dimensión ambiental en la planificación del territorio                                                                                                            | CORPMAG       |
| Diagnóstico y manejo integral de cuencas y microcuencas en el departamento del Magdalena                                                                                                                    | CORPMAG       |
| Proceso de ordenamiento pesquero en el departamento del Magdalena                                                                                                                                           | CORPMAG       |
| Implementación del esquema de pagos por servicios ambientales banco2 en el departamento del Magdalena                                                                                                       | CORPMAG       |
| Arborización urbana                                                                                                                                                                                         | CORPMAG       |
| Investigación sobre la biodiversidad de especies de la SNSM                                                                                                                                                 | CORPMAG       |
| Implementación del plan operativo de mercados verdes                                                                                                                                                        | CORPMAG       |
| Plan de desarrollo sostenible de la Sierra Nevada de Santa Marta                                                                                                                                            | CORPMAG       |
| Fortalecer mecanismos para la identificación y promoción de sistemas productivos sostenibles y para la generación y aplicación de incentivos y estrategias de conservación de la biodiversidad en la región | CORPOAMAZONÍA |
| Plan de acción inversión generación hídrica                                                                                                                                                                 | CORPOBOYACÁ   |
| Formación de una cultura para la sostenibilidad ambiental                                                                                                                                                   | CORPOBOYACÁ   |
| Gestión de la oferta hídrica                                                                                                                                                                                | CORPOBOYACÁ   |
| Educación ambiental y procesos participativos                                                                                                                                                               | CORPOBOYACÁ   |
| Fomento a la producción agropecuaria y forestal sostenible                                                                                                                                                  | CORPOCALDAS   |
| Participación ciudadana para la gestión ambiental integral                                                                                                                                                  | CORPOCALDAS   |
| Planificación de la biodiversidad                                                                                                                                                                           | CORPOCALDAS   |
| Hacia una comunicación pública para la sostenibilidad ambiental                                                                                                                                             | CORPOCALDAS   |
| Capacitación para la conservación y uso sostenible de la biodiversidad                                                                                                                                      | CORPOCALDAS   |
| Implementación del plan de ordenación forestal del departamento del Cesar                                                                                                                                   | CORPOCESAR    |
| Implementación de acciones para la recuperación, restauración y aprovechamiento sostenible del recurso flora                                                                                                | CORPOCESAR    |
| Ejecución del plan de manejo ambiental y acciones prioritarias de mitigación y mejoramiento de la Ecoregión Estratégica Complejo Cenagoso de Zapatos y humedales menores                                    | CORPOCESAR    |
| Formulación e implementación de planes de ordenación y manejo de cuencas en el departamento del Cesar                                                                                                       | CORPOCESAR    |
| Educación ambiental para la formación social y participación comunitaria                                                                                                                                    | CORPOCHIVOR   |
| Implementación de sistemas agroalimentarios a través de prácticas productivas sostenibles y limpias, en el marco de cadenas productivas                                                                     | CORPOCHIVOR   |
| Promover la investigación aplicada en descontaminación de aguas                                                                                                                                             | CORPOCHIVOR   |
| Gestión y desarrollo forestal                                                                                                                                                                               | CORPOGUAJIRA  |
| Educación formal                                                                                                                                                                                            | CORPOGUAJIRA  |
| Gestión ambiental urbana                                                                                                                                                                                    | CORPOGUAJIRA  |
| Diagnóstico y acciones para la recuperación y conservación de ecosistemas                                                                                                                                   | CORPOGUAJIRA  |
| Aplicación y asistencia de iniciativas que generen empleo productivo ambiental                                                                                                                              | CORPOGUAVIO   |
| Recuperación ecológica y/o reforestación en cuencas tributarias de acueductos municipales                                                                                                                   | CORPOGUAVIO   |
| Mejoramiento de la educación y sensibilización ambientales                                                                                                                                                  | CORPOGUAVIO   |
| Implantación de sistemas lúdicos de formación de valores ambientales                                                                                                                                        | CORPOGUAVIO   |
| Fomento a la participación comunitaria                                                                                                                                                                      | CORPOGUAVIO   |
| Implementación de alternativas productivas sostenibles y capacitación a grupos de pescadores de la jurisdicción de Corpomojana                                                                              | CORPOMOJANA   |
| Adecuación y dotación para la investigación en fauna <i>crocodyllia</i>                                                                                                                                     | CORPOMOJANA   |

|                                                                                                                                                                                                                 |               |
|-----------------------------------------------------------------------------------------------------------------------------------------------------------------------------------------------------------------|---------------|
| Establecimiento de plantaciones protectoras para la restauración de la parte baja de las microcuencas de los arroyos Grande Corozal y Manzanares, jurisdicción de Corpomojana                                   | CORPOMOJANA   |
| Formulación y desarrollo del plan de ordenamiento forestal del área de jurisdicción de Corpomojana                                                                                                              | CORPOMOJANA   |
| Implementación de prácticas biológicas sostenibles con pequeños productores campesinos de los municipios de San Marcos, Caimito, San Benito Abad y Sucre, departamento de Sucre                                 | CORPOMOJANA   |
| Diagnóstico, manejo y ordenamiento de cuencas hidrográficas en el área de jurisdicción de Corpomojana                                                                                                           | CORPOMOJANA   |
| Establecimiento de sistemas de regulación y manejo de caudales (zona centro, norte, sur y sur occidente)                                                                                                        | CORPONARIÑO   |
| Ordenamiento, manejo y apovechamiento sostenible de los bosques naturales de la Costa Pacífica                                                                                                                  | CORPONARIÑO   |
| Ordenamiento y manejo integral de cuencas y microcuencas abastecedoras de acueductos de las cabeceras municipales (Mayo y Juanambu) zona norte                                                                  | CORPONARIÑO   |
| Conservación y manejo sostenible de los ecosistemas de Páramo Andino Amazónico (Bordoncillo, Patascoy, Humedal Ramsar la Cocha y páramos aledaños al río Bobo-las piedras)                                      | CORPONARIÑO   |
| Educación ambiental y capacitación para el manejo y aprovechamiento forestal sostenible de los bosques naturales en los consejos comunitarios de la Costa Pacífica de Nariño                                    | CORPONARIÑO   |
| Implementación del programa de tasa de uso del agua y seguimiento a usuarios de concesiones y seguimiento a planes de uso eficiente y ahorro del agua                                                           | CORPONARIÑO   |
| Fomento al aprovechamiento sostenible de bienes y servicios derivados de la biodiversidad bajo el enfoque de cadena de valor                                                                                    | CORPONARIÑO   |
| Estructuración de la primera fase de la línea de investigación en biodiversidad, agua y suelo                                                                                                                   | CORPONARIÑO   |
| Gestión para el ordenamiento y manejo de la cuenca hidrográfica del río Pamplonita                                                                                                                              | CORPONOR      |
| Administración del sistema regional de áreas de manejo especial                                                                                                                                                 | CORPONOR      |
| Implementación del plan de manejo ambiental del área de influencia de la planta térmica                                                                                                                         | CORPONOR      |
| Manejo sostenible de la biodiversidad y sistemas de producción sostenible                                                                                                                                       | CORPONOR      |
| Desarrollo productivo con sostenibilidad ambiental                                                                                                                                                              | CORPORINOQUÍA |
| Manejo integral de cuencas estratégicas                                                                                                                                                                         | CORPORINOQUÍA |
| Seguimiento aguas subterráneas eje bananero                                                                                                                                                                     | CORPOURABÁ    |
| Plan de ordenación y manejo forestal Serranía de Abibe                                                                                                                                                          | CORPOURABÁ    |
| Etnobotánica en caimán nuevo                                                                                                                                                                                    | CORPOURABÁ    |
| Comunicaciones y educación ambiental                                                                                                                                                                            | CORPOURABÁ    |
| Ordenación, manejo, recuperación de bosques y biodiversidad                                                                                                                                                     | CORPOURABÁ    |
| Ordenación de cuencas y aguas subterráneas                                                                                                                                                                      | CORPOURABÁ    |
| Administración de los recursos naturales y del ambiente                                                                                                                                                         | CORPOURABÁ    |
| Producción limpia                                                                                                                                                                                               | CORPOURABÁ    |
| Establecimiento proyectos piloto de agricultura urbana                                                                                                                                                          | CORTOLIMA     |
| Biocomercio                                                                                                                                                                                                     | CRA           |
| Estrategia de comunicación en asuntos ambientales                                                                                                                                                               | CRA           |
| Sistema de apoyo para la declaración y establecimiento de áreas protegidas a municipios, consolidación del sistema de red de reservas de la sociedad civil y promoción de corredores biológicos y ecoturísticos | CRA           |
| Capacitación para el desarrollo sostenible y aprovechamiento forestal                                                                                                                                           | CRA           |
| Estudios de especies promisorias de fauna y flora                                                                                                                                                               | CRA           |
| Capacitación a las comunidades a través de los promotores ambientales (capacitación técnica y ambiental a las comunidades indígenas)                                                                            | CRA           |
| Recuperación y aprovechamiento ecoturístico de las diferentes playas presentes en el departamento                                                                                                               | CRA           |
| Reforestación protectora y productora – protectora con especies nativas e introducidas en zonas de interés ambiental con sus respectivos mantenimientos                                                         | CRA           |
| Recuperación y protección ambiental en los municipios del departamento                                                                                                                                          | CRA           |
| Estructuración de la red de promotores ambientales y actividades con las comunidades                                                                                                                            | CRA           |
| Elaboración y publicación de estrategias pedagógicas para el conocimiento y conservación de los recursos de la biodiversidad desarrollados en el departamento                                                   | CRA           |
| Formulación de los planes de ordenamiento y manejo de cuencas hidrográficas e inversión en las cuencas con POMCH aprobados                                                                                      | CRC           |
| Repoblación, manejo de rodales y capacitación en la transformación de la guadua                                                                                                                                 | CRC           |
| Alternativas de producción agropecuaria sostenible                                                                                                                                                              | CRC           |
| Gestión para la recuperación, conservación y protección de las poblaciones de flora silvestre                                                                                                                   | CRC           |
| Fortalecimiento de las capacidades locales para la conservación, recuperación y uso sostenible del ecosistema manglar en el marco del plan ambiental de los manglares                                           | CRC           |
| Repoblación forestal de ecosistemas estratégicos                                                                                                                                                                | CRC           |

|                                                                                                                                                                                                                                    |     |
|------------------------------------------------------------------------------------------------------------------------------------------------------------------------------------------------------------------------------------|-----|
| Producción limpia y mercados verdes                                                                                                                                                                                                | CRC |
| Alternativas de producción sostenible acorde con la calidad de suelos                                                                                                                                                              | CRC |
| Conservación, manejo y uso sostenible de la biodiversidad                                                                                                                                                                          | CRQ |
| Sistemas sostenibles de producción rural                                                                                                                                                                                           | CRQ |
| Gotita de agua                                                                                                                                                                                                                     | CRQ |
| Pensemos en el futuro, ahorremos agua                                                                                                                                                                                              | CRQ |
| No me arriesgo                                                                                                                                                                                                                     | CRQ |
| El suelo un capital natural                                                                                                                                                                                                        | CRQ |
| Implementación del plan de ordenamiento y manejo de la cuenca del Río La Vieja                                                                                                                                                     | CRQ |
| Apoyo en el mejoramiento ambiental de procesos productivos agrícolas, pecuarios y forestales                                                                                                                                       | CRQ |
| Protección de fuentes de agua y recursos de conectividad del paisaje en la subcuenca de la quebrada Santo Domingo, municipio de Simití, sur del departamento de Bolívar                                                            | CSB |
| Recuperación de microcuencas de acueductos veredales y municipales                                                                                                                                                                 | CSB |
| Implementación de prácticas sostenibles de producción y extracción en los sectores productivos con fines de mercados verdes en la jurisdicción de la CSB                                                                           | CSB |
| Determinación del estado actual y formulación de planes de manejo para los páramos de la cordillera central del Valle del Cauca, jurisdicción CVC                                                                                  | CVC |
| Mejoramiento ambiental en el área del corredor de conservación Parque Nacional Natural Tatamá Serranía de los Paraguas con la participación de las organizaciones de base comunitaria y los entes territoriales de la región       | CVC |
| Desarrollo de iniciativas de biocomercio de productos y servicios ambientales no maderables y fauna en el departamento del valle del cauca                                                                                         | CVC |
| Operación de modelos productivos agroecológicos                                                                                                                                                                                    | CVC |
| Proyecto piloto gestión integral participativa en la administración del agua en el río Tuluá                                                                                                                                       | CVC |
| Restauración de suelos erosionados y caminos veredales en el corregimiento el Saladito, municipio de Cali                                                                                                                          | CVC |
| Formación ciudadana                                                                                                                                                                                                                | CVC |
| Mejoramiento de prácticas agrícolas zona Pacífica                                                                                                                                                                                  | CVC |
| Diseño e implementación de herramientas de manejo de paisaje en el Jardín Botánico de Cali y su área de influencia                                                                                                                 | CVC |
| Gestión integral y provisión de servicios ambientales ecosistémicos para la conservación del recurso hídrico en cuencas estratégicas del Valle del Cauca                                                                           | CVC |
| Recuperación y mejoramiento de los bienes y servicios ambientales que ofrecen los ecoparques de Tres Cruces y la Bandera en Santiago de Cali                                                                                       | CVC |
| Reconversión y mejoramiento de prácticas agrícolas y ganaderas                                                                                                                                                                     | CVC |
| Cultura ambiental ciudadana para una Cali mundial                                                                                                                                                                                  | CVC |
| Recuperación paisajística y ambiental de zonas de espacio público en el barrio la Santa Cruz, municipio de Tuluá                                                                                                                   | CVC |
| Formulación del plan de ordenamiento y manejo ambiental de la cuenca hidrográfica del río San pedro                                                                                                                                | CVC |
| Construcción sendero ecológico Guabas-Madre Vieja Videles, municipio de Guacari                                                                                                                                                    | CVC |
| Mantenimiento de los ecoparques Pisamos y Bataclán y del vivero municipal en Santiago de Cali                                                                                                                                      | CVC |
| Diseño e implementación de sistemas productivos sostenibles y servicios ambientales en áreas de interés ambiental                                                                                                                  | CVC |
| Recuperación ambiental de humedales urbanos en la zona sur de la ciudad de Santiago de Cali: El Limonar, Cañasgordas, El Retiro, Panamericano y La Babilla                                                                         | CVC |
| Conservación y recuperación de los ecosistemas manglar y selva pluvial tropical a través de estrategias participativas en territorios colectivos de comunidades negras del Pacífico Vallecaucano                                   | CVC |
| Recuperación paisajista y ambiental de la Acequia Chambimbal en el sector comprendido entre los barrios La Bombonera, Bello Horizonte y Las Palmitas en el municipio de Buga                                                       | CVC |
| Adecuación y recuperación física, ambiental y paisajística del jarillón y la franja protectora del río Cauca, desde la bocatoma de la planta de tratamiento de Puerto Mallarino hasta el inicio del asentamiento Samanes del Cauca | CVC |
| Manejo de especies arbóreas, parques, zonas verdes y control de hormiga arriera en la ciudad de Santiago de Cali                                                                                                                   | CVC |
| Adecuación y recuperación física, ambiental y paisajística de 40 parques barriales en las 22 comunas de Santiago de Cali                                                                                                           | CVC |
| Desarrollo empresarial entorno a la cadena productiva de la guadua ( <i>Guadua angustifolia</i> )                                                                                                                                  | CVC |
| Elaboración y difusión de guías mineroambientales                                                                                                                                                                                  | CVC |
| Fortalecimiento de procesos socioeducativos de las comunidades étnicas del departamento orientados a la conservación de los recursos naturales y el ambiente                                                                       | CVC |

|                                                                                                                                                                         |     |
|-------------------------------------------------------------------------------------------------------------------------------------------------------------------------|-----|
| Asesoría al sector formal de la educación en el Valle del Cauca                                                                                                         | CVC |
| Diseño, validación e implementación de la estrategia de educación ambiental y fortalecimiento de comunidades en procesos y proyectos de uso y manejo eficiente del agua | CVC |
| Manejo y conservación del recurso hídrico en el departamento de Córdoba                                                                                                 | CVS |
| Educación ambiental como base estructural de la política regional y gobernanza                                                                                          | CVS |
